# Supplementary material for: Cross-dataset Evaluation of Dementia Longitudinal Progression Prediction Models
Source: bioRxiv or medRxiv preprint supplement (doi:10.1101/2024.11.18.24317513), 2025-06-11
Supplement: Supplementary file [file media-1.pdf]

## Supplementary Materials

**Table S1.** Scanner information for 9668 scans in ADNI dataset.

| Vendor             | Scanner Model                     | Field Strength | Number of Scans |
|--------------------|-----------------------------------|----------------|-----------------|
| GE                 | Discovery MR750                   | 3.0T           | 886             |
|                    | Discovery MR750w                  | 3.0T           | 123             |
|                    | Genesis Signa                     | 1.5T           | 248             |
|                    |                                   | 3.0T           | 6               |
|                    | Signa Excite                      | 1.5T           | 892             |
|                    |                                   | 3.0T           | 6               |
|                    | Signa HDx                         | 1.5T           | 463             |
|                    |                                   | 3.0T           | 36              |
|                    | Signa HDxt                        | 1.5T           | 208             |
|                    |                                   | 3.0T           | 419             |
| Signa Premier      | 3.0T                              | 33             |                 |
| Signa UHP          | 3.0T                              | 1              |                 |
| Philips            | Achieva dStream                   | 3.0T           | 88              |
|                    | Ingenia                           | 3.0T           | 180             |
|                    | Ingenia Elition X                 | 3.0T           | 8               |
|                    | Achieva                           | 1.5T           | 73              |
|                    |                                   | 3.0T           | 541             |
|                    | Gemini                            | 3.0T           | 32              |
|                    | Gyrosan Intera                    | 1.5T           | 12              |
|                    | Gyrosan NT                        | 1.5T           | 2               |
|                    | Ingenuity                         | 3.0T           | 18              |
|                    | Intera                            | 1.5T           | 333             |
|                    |                                   | 3.0T           | 217             |
| Intera Achieva     | 1.5T                              | 6              |                 |
| SIEMENS            | Allegra                           | 3.0T           | 32              |
|                    | Avanto                            | 1.5T           | 391             |
|                    | Biograph_mMR                      | 3.0T           | 19              |
|                    | Espreo                            | 1.5T           | 24              |
|                    | Numaris4                          | 1.5T           | 2               |
|                    | Prisma                            | 3.0T           | 191             |
|                    | Prisma_fit/Magnetom<br>Prisma_fit | 3.0T           | 466             |
|                    |                                   | 3.0T           | 466             |
|                    | Skyra                             | 3.0T           | 406             |
|                    | Skyra_fit                         | 3.0T           | 17              |
|                    | Sonata                            | 1.5T           | 379             |
|                    | SonataVision                      | 1.5T           | 31              |
|                    | Symphony/Symphony<br>Tim          | 1.5T           | 671             |
|                    | Trio/TrioTim                      | 3.0T           | 1487            |
|                    | Verio                             | 3.0T           | 718             |
| Skyra DicomCleaner | 3.0T                              | 3              |                 |

**Table S2.** Scanner information for 940 scans in AIBL dataset.

| Vendor  | Scanner Model | Field Strength | Number of Scans |
|---------|---------------|----------------|-----------------|
| SIEMENS | Avanto        | 1.5T           | 245             |
|         | Trio/TrioTim  | 3.0T           | 622             |
|         | Verio         | 3.0T           | 73              |

**Table S3.** Scanner information for 1453 scans in MACC dataset.

| Vendor  | Scanner Model | Field Strength | Number of Scans |
|---------|---------------|----------------|-----------------|
| SIEMENS | Prisma        | 3.0T           | 85              |
|         | Trio/TrioTim  | 3.0T           | 1368            |

**Table S4.** Scanner information for 2519 scans in OASIS dataset.

| Vendor  | Scanner Model                     | Field Strength | Number of Scans |
|---------|-----------------------------------|----------------|-----------------|
| SIEMENS | Avanto                            | 1.5T           | 2               |
|         | Biograph_mMR                      | 3.0T           | 812             |
|         | Magnetom Vida                     | 3.0T           | 305             |
|         | Prisma_fit/Magnetom<br>Prisma_fit | 3.0T           | 1               |
|         | Sonata                            | 1.5T           | 40              |
|         | Trio/TrioTim                      | 3.0T           | 1359            |

**Table S5.** Our study used five regional brain volumes (Hippocampus, Fusiform, MidTemp, Ventricles, WholeBrain), computed by summing the volumes of various FreeSurfer regions of interest. Note that the 6<sup>th</sup> anatomical volume (intracranial volume) was directly provided by FreeSurfer.

| Regional volumetric feature | Brain regions used to compute regional volumes                                                                                                                                                                                                                                                                                                                                                                                                                                                       |
|-----------------------------|------------------------------------------------------------------------------------------------------------------------------------------------------------------------------------------------------------------------------------------------------------------------------------------------------------------------------------------------------------------------------------------------------------------------------------------------------------------------------------------------------|
| Hippocampus                 | Left-Hippocampus, Right-Hippocampus                                                                                                                                                                                                                                                                                                                                                                                                                                                                  |
| Fusiform                    | lh_fusiform_volume, rh_fusiform_volume                                                                                                                                                                                                                                                                                                                                                                                                                                                               |
| MidTemp                     | lh_middletemporal_volume, rh_middletemporal_volume                                                                                                                                                                                                                                                                                                                                                                                                                                                   |
| Ventricles                  | Left-Inf-Lat-Vent, Left-Lateral-Ventricle, Right-Inf-Lat-Vent, Right-Lateral-Ventricle                                                                                                                                                                                                                                                                                                                                                                                                               |
| WholeBrain                  | WM-hypointensities, Left-Cerebellum-Cortex, Left-Cerebellum-White-Matter, Left-Thalamus-Proper, Left-Caudate, Left-Putamen, Left-Pallidum, Left-Hippocampus, Left-Amygdala, Left-Accumbens-area, Left-VentralDC, Right-Cerebellum-Cortex, Right-Cerebellum-White-Matter, Right-Thalamus-Proper, Right-Caudate, Right-Putamen, Right-Pallidum, Right-Hippocampus, Right-Amygdala, Right-Accumbens-area, Right-VentralDC, lhCortexVol, rhCortexVol, lhCerebralWhiteMatterVol, rhCerebralWhiteMatterVol |

**Table S6.** Complete set of L2C-XGBw and L2C-XGBnw features and their corresponding original features.

| <b>Original feature</b>                              | <b>L2C features</b>                                                                                                                                           |
|------------------------------------------------------|---------------------------------------------------------------------------------------------------------------------------------------------------------------|
| Demographic and time-related features                | APOE4, is_male, educ, marital_status, current_age, month_since_baseline,                                                                                      |
| Clinical diagnosis (categorical: CN, MCI, AD)        | mr_dx, time_since_mr_dx, best_dx, time_since_best_dx, worst_dx, time_since_worst_dx, milder, time_since_milder,                                               |
| MMSE score (numeric, ordinal: 0-30)                  | mr_MMSE, time_since_mr_MMSE, mr_change_MMSE, low_MMSE, time_since_low_MMSE, high_MMSE, time_since_high_MMSE,                                                  |
| CDR_GLOBAL score (numeric, ordinal: 0, 0.5, 1, 2, 3) | mr_CDR, time_since_mr_CDR, mr_change_CDR, low_CDR, time_since_low_CDR, high_CDR, time_since_high_CDR,                                                         |
| Ventricle volume (numeric, continuous)               | mr_Ventricles, time_since_mr_Ventricles, mr_change_Ventricles, low_Ventricles, time_since_low_Ventricles, high_Ventricles, time_since_high_Ventricles,        |
| Fusiform volume (numeric, continuous)                | mr_Fusiform, time_since_mr_Fusiform, mr_change_Fusiform, low_Fusiform, time_since_low_Fusiform, high_Fusiform, time_since_high_Fusiform,                      |
| WholeBrain volume (numeric, continuous)              | mr_WholeBrain, time_since_mr_WholeBrain, mr_change_WholeBrain, low_WholeBrain, time_since_low_WholeBrain, high_WholeBrain, time_since_high_WholeBrain,        |
| Hippocampus volume (numeric, continuous)             | mr_Hippocampus, time_since_mr_Hippocampus, mr_change_Hippocampus, low_Hippocampus, time_since_low_Hippocampus, high_Hippocampus, time_since_high_Hippocampus, |
| Middle temporal volume (numeric, continuous)         | mr_MidTemp, time_since_mr_MidTemp, mr_change_MidTemp, low_MidTemp, time_since_low_MidTemp, high_MidTemp, time_since_high_MidTemp,                             |
| Intracranial volume (numeric, continuous)            | mr_ICV, time_since_mr_ICV, mr_change_ICV, low_ICV, time_since_low_ICV, high_ICV, time_since_high_ICV                                                          |

**Table S7.** L2C-FNN input vector dimensionality. For discrete features, the calculation is performed after one-hot encoding, including an additional class for missing data or unknown.

| Category                                                                             | L2C features                                                                                                                                                                                                                                                                                                                                                                                                                                                                                                                                                                                                                                                                                                                                                                                                                                                | Feature dimension |
|--------------------------------------------------------------------------------------|-------------------------------------------------------------------------------------------------------------------------------------------------------------------------------------------------------------------------------------------------------------------------------------------------------------------------------------------------------------------------------------------------------------------------------------------------------------------------------------------------------------------------------------------------------------------------------------------------------------------------------------------------------------------------------------------------------------------------------------------------------------------------------------------------------------------------------------------------------------|-------------------|
| Discrete features (dimensions are after one-hot encoding, including “unknown” class) | apoe                                                                                                                                                                                                                                                                                                                                                                                                                                                                                                                                                                                                                                                                                                                                                                                                                                                        | 4                 |
|                                                                                      | is_male                                                                                                                                                                                                                                                                                                                                                                                                                                                                                                                                                                                                                                                                                                                                                                                                                                                     | 3                 |
|                                                                                      | marital_status                                                                                                                                                                                                                                                                                                                                                                                                                                                                                                                                                                                                                                                                                                                                                                                                                                              | 3                 |
|                                                                                      | mr_CDR                                                                                                                                                                                                                                                                                                                                                                                                                                                                                                                                                                                                                                                                                                                                                                                                                                                      | 6                 |
|                                                                                      | high_CDR                                                                                                                                                                                                                                                                                                                                                                                                                                                                                                                                                                                                                                                                                                                                                                                                                                                    | 6                 |
|                                                                                      | low_CDR                                                                                                                                                                                                                                                                                                                                                                                                                                                                                                                                                                                                                                                                                                                                                                                                                                                     | 6                 |
|                                                                                      | mr_dx                                                                                                                                                                                                                                                                                                                                                                                                                                                                                                                                                                                                                                                                                                                                                                                                                                                       | 4                 |
|                                                                                      | best_dx                                                                                                                                                                                                                                                                                                                                                                                                                                                                                                                                                                                                                                                                                                                                                                                                                                                     | 4                 |
|                                                                                      | worst_dx                                                                                                                                                                                                                                                                                                                                                                                                                                                                                                                                                                                                                                                                                                                                                                                                                                                    | 4                 |
| milder                                                                               | 3                                                                                                                                                                                                                                                                                                                                                                                                                                                                                                                                                                                                                                                                                                                                                                                                                                                           |                   |
| MRI features                                                                         | mr_Ventricles, time_since_mr_Ventricles, mr_change_Ventricles, low_Ventricles, time_since_low_Ventricles, high_Ventricles, time_since_high_Ventricles, mr_Fusiform, time_since_mr_Fusiform, mr_change_Fusiform, low_Fusiform, time_since_low_Fusiform, high_Fusiform, time_since_high_Fusiform, mr_WholeBrain, time_since_mr_WholeBrain, mr_change_WholeBrain, low_WholeBrain, time_since_low_WholeBrain, high_WholeBrain, time_since_high_WholeBrain, mr_Hippocampus, time_since_mr_Hippocampus, mr_change_Hippocampus, low_Hippocampus, time_since_low_Hippocampus, high_Hippocampus, time_since_high_Hippocampus, mr_MidTemp, time_since_mr_MidTemp, mr_change_MidTemp, low_MidTemp, time_since_low_MidTemp, high_MidTemp, time_since_high_MidTemp, mr_ICV, time_since_mr_ICV, mr_change_ICV, low_ICV, time_since_low_ICV, high_ICV, time_since_high_ICV | 42                |
| Cognitive features                                                                   | mr_MMSE, time_since_mr_MMSE, mr_change_MMSE, low_MMSE, time_since_low_MMSE, high_MMSE, time_since_high_MMSE, time_since_mr_CDR, time_since_low_CDR, time_since_high_CDR,                                                                                                                                                                                                                                                                                                                                                                                                                                                                                                                                                                                                                                                                                    | 10                |
| Diagnostic features                                                                  | time_since_mr_dx, time_since_best_dx, time_since_worst_dx                                                                                                                                                                                                                                                                                                                                                                                                                                                                                                                                                                                                                                                                                                                                                                                                   | 3                 |
| Demographic and time-dependent features                                              | baseline education level, current_age, month_since_baseline                                                                                                                                                                                                                                                                                                                                                                                                                                                                                                                                                                                                                                                                                                                                                                                                 | 3                 |

(a) AIBL vs. ADNI

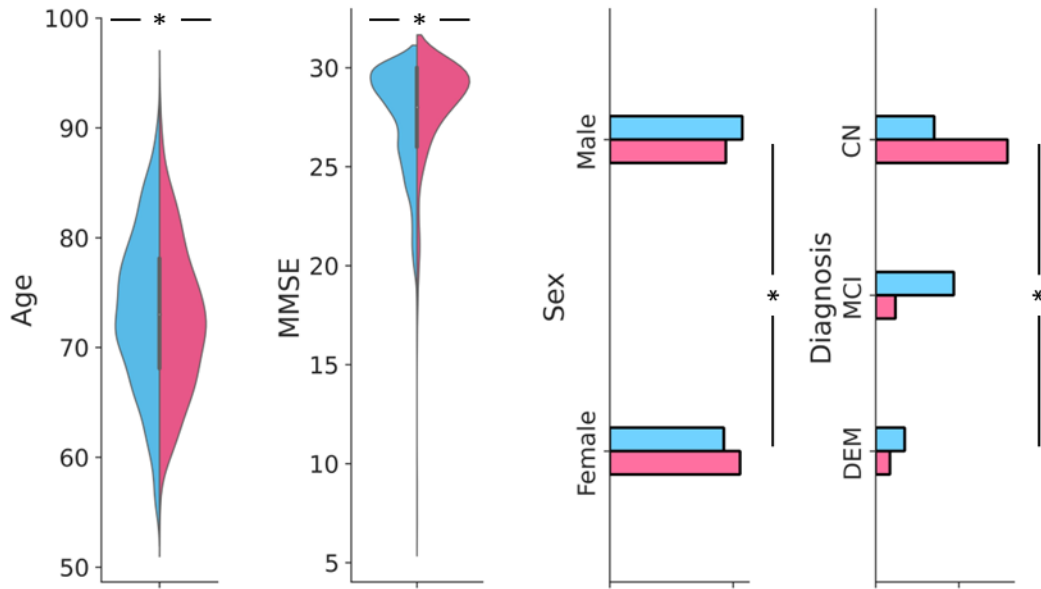

(b) MACC vs. ADNI

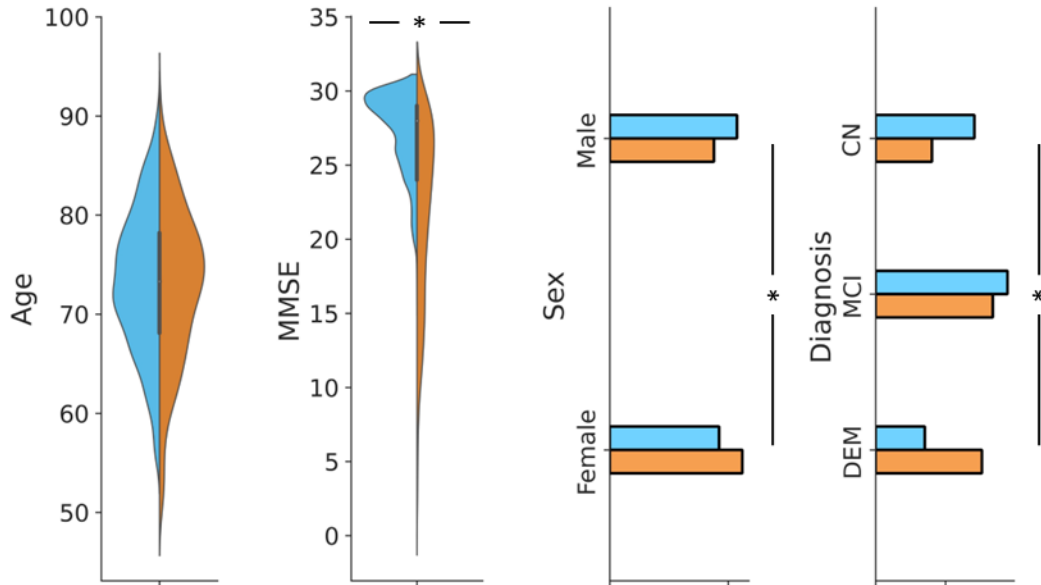

(c) OASIS vs. ADNI

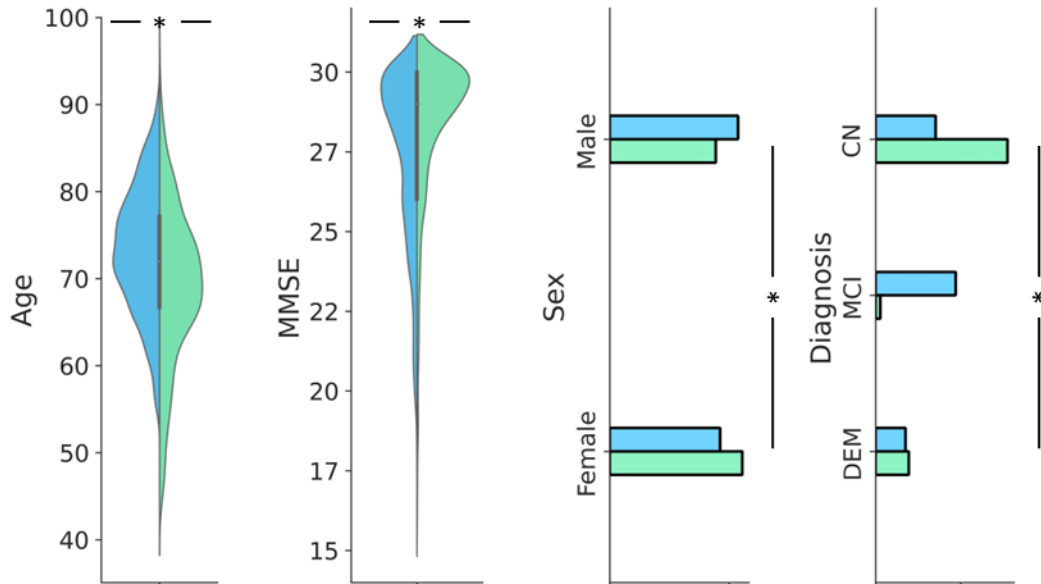

**Figure S1.** Baseline age, baseline MMSE, sex and baseline clinical diagnosis distribution differences between ADNI and external test set. (a) Distributions of age, sex, MMSE and clinical diagnosis for ADNI (blue) and AIBL (pink). (b) Distributions of age, sex, MMSE and clinical diagnosis for ADNI (blue) and MACC (yellow). (c) Distributions of age, sex, MMSE and clinical diagnosis for ADNI (blue) and OASIS (green). To test for differences in mean age and mean MMSE between ADNI and the external dataset, a permutation test was used. To test for differences in distributions of sex and diagnosis between ADNI and the external dataset, the chi square test was used. \* indicates statistical significance after correcting for multiple comparisons with false discovery rate (FDR)  $q < 0.05$ . See Table 2 in the main text for the full set of statistical tests.

(a) ADNI

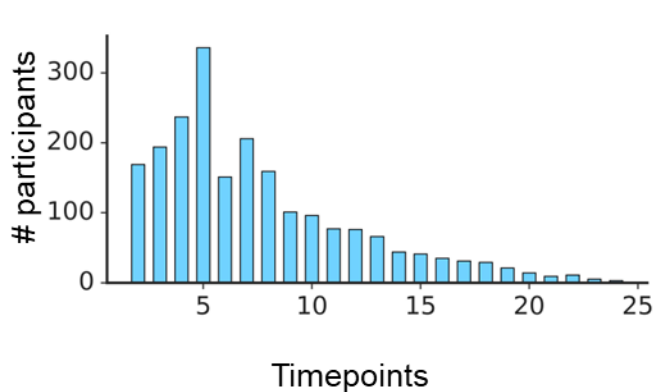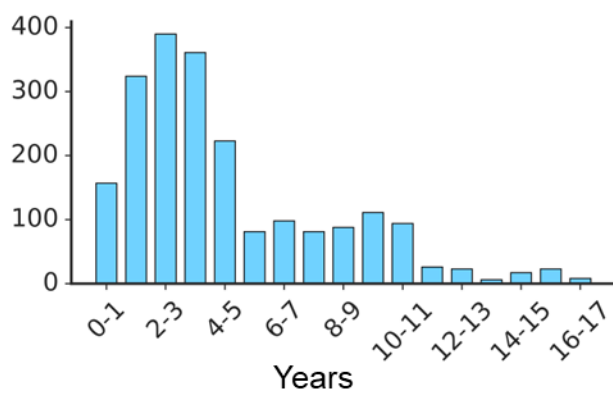

(b) AIBL

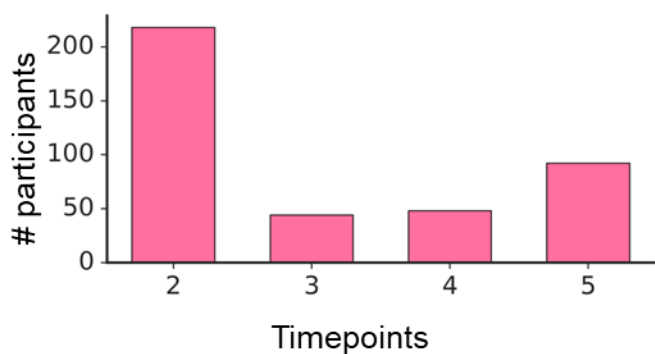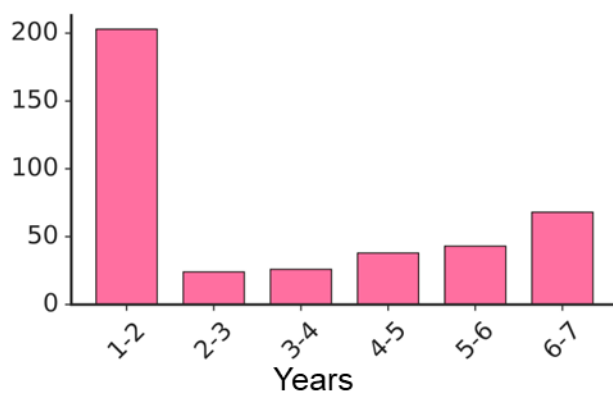

(c) MACC

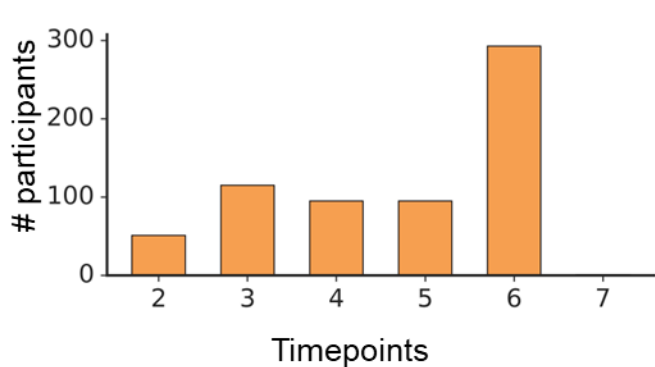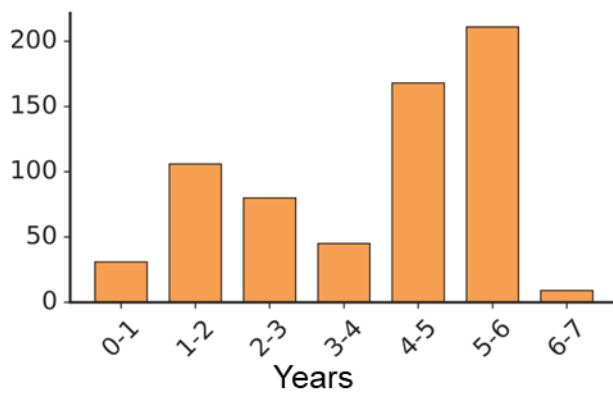

(d) OASIS

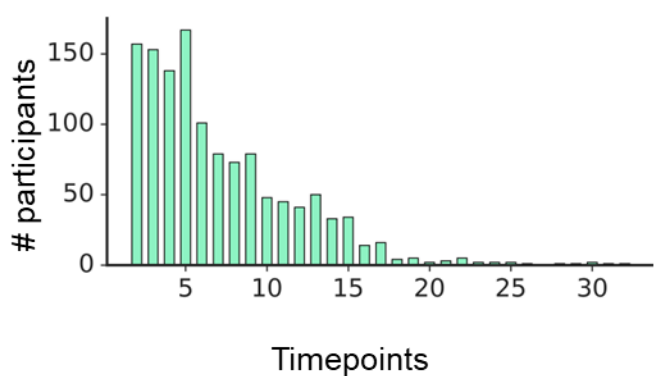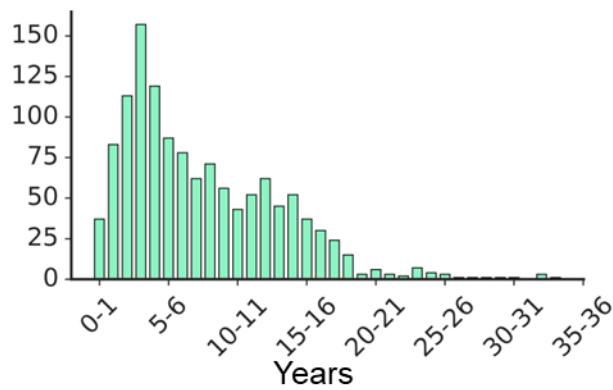

**Figure S2. Left:** Distribution of the number of timepoints for all participants in each dataset. **Right:** Distribution of the number of years between baseline and the last observation for all participants in each dataset. Note that year 0-1 means  $0 < t \leq 12$ , where  $t$  is the interval between baseline and the last observed timepoint; year 1-2 means  $12 < t \leq 24$ , and so on. (a) ADNI. (b) AIBL. (c) MACC. (d) OASIS.



### Example for conducting paired-samples t-test

- Goal: compare MMSE prediction accuracies on an external test set (e.g., AIBL) between MinimalRNN and L2C-FNN measured with individual-level MAE
- The comparison uses all  $J$  participants in the test set
- $k$  represents model trained using  $k_{th}$  cross-validation split
- Each participant may have multiple visits, which are colored dots in a1 and b1
  - Each dot represents the MMSE prediction MAE at one timepoint, predicted using the first 50% timepoints of the same participant.

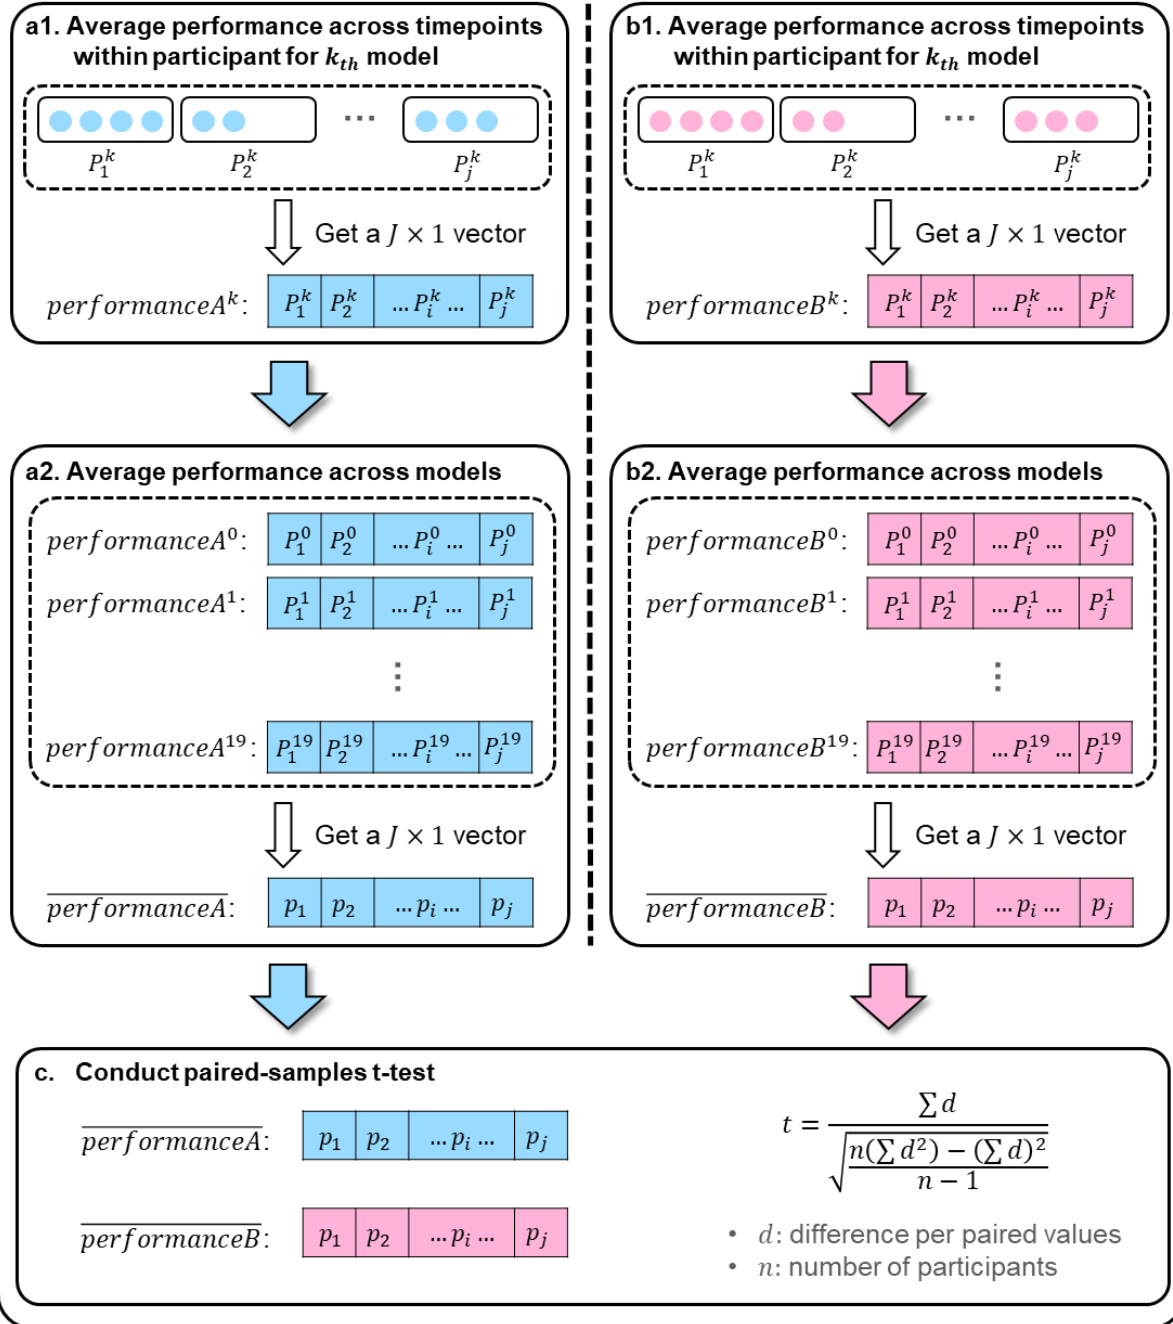

**Figure S3. Illustration of paired-samples t-test for comparing performance measured with individual-level metrics (e.g., MMSE MAE) of MinimalRNN and L2C-FNN on an external test set. (a1) For a given model, we averaged the MMSE MAE within each**

participant across all timepoints for MinimalRNN. (a2) Averaging the participant-level MMSE MAE obtained in (a1) across the 20 models. (b1 & b2) Same as a1 and a2 but for L2C-FNN. (c) Conduct paired-samples t-test to obtain p value.

### Example for conducting permutation test

- Goal: compare clinical diagnosis accuracies on an external test set (e.g., AIBL) between **MinimalRNN** and **L2C-FNN** measured with group-level metrics (e.g., mAUC)
- The comparison uses all  $J$  participants in the test set
- $k$  represents model trained using  $k_{th}$  cross-validation split
- Each participant may have multiple visits, which are colored triangles in **a** and **b**
  - Each triangle represents the clinical diagnosis prediction probabilities at one timepoint, predicted using the first 50% timepoints of the same participant.

#### a. Average predictions across models at each timepoint

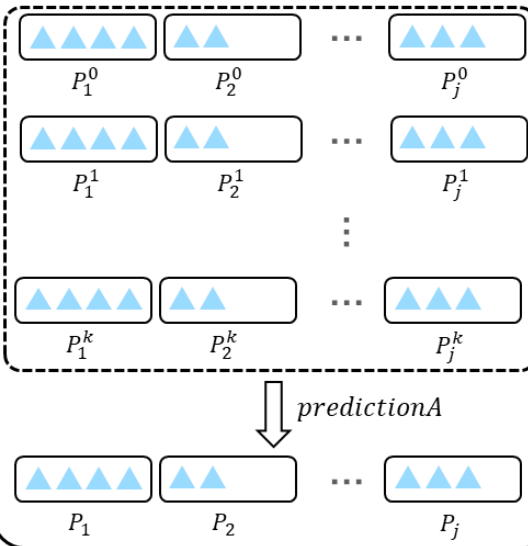

#### b. Average predictions across models at each timepoint

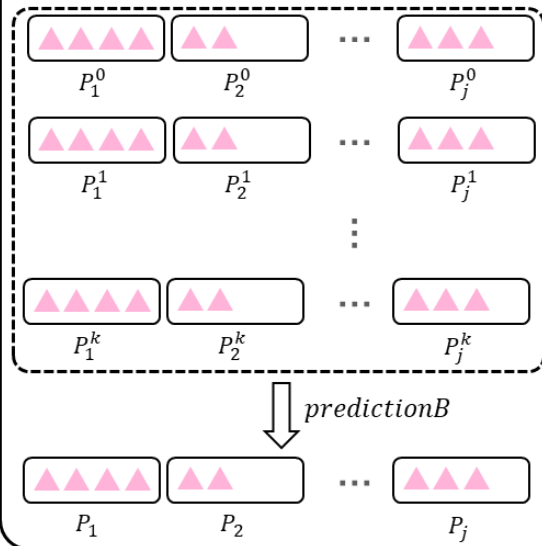

#### c. Conduct permutation test (N=10,000)

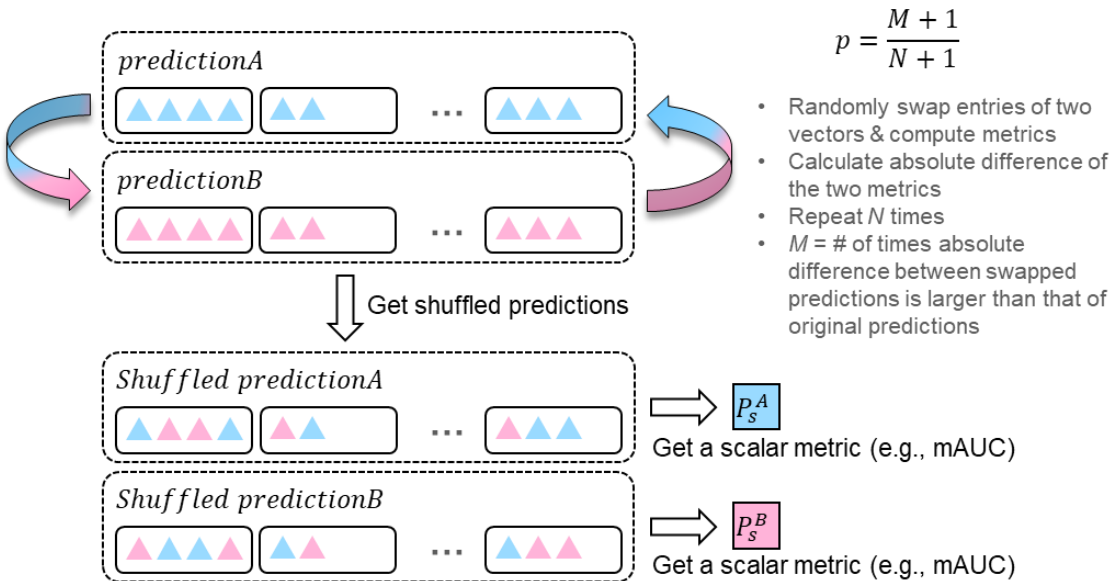

**Figure S4. Illustration of permutation test for comparing performance measured with group-level metric (e.g., diagnostic prediction mAUC) of MinimalRNN and L2C-FNN on external test set.** (a) For each participant, we averaged the predictions at each timepoint across 20 models for MinimalRNN. (b) Same as A but for L2C-FNN. (c) Permute 10,000 times and compute group-level metric (e.g., mAUC) on permuted predictions to obtain p value

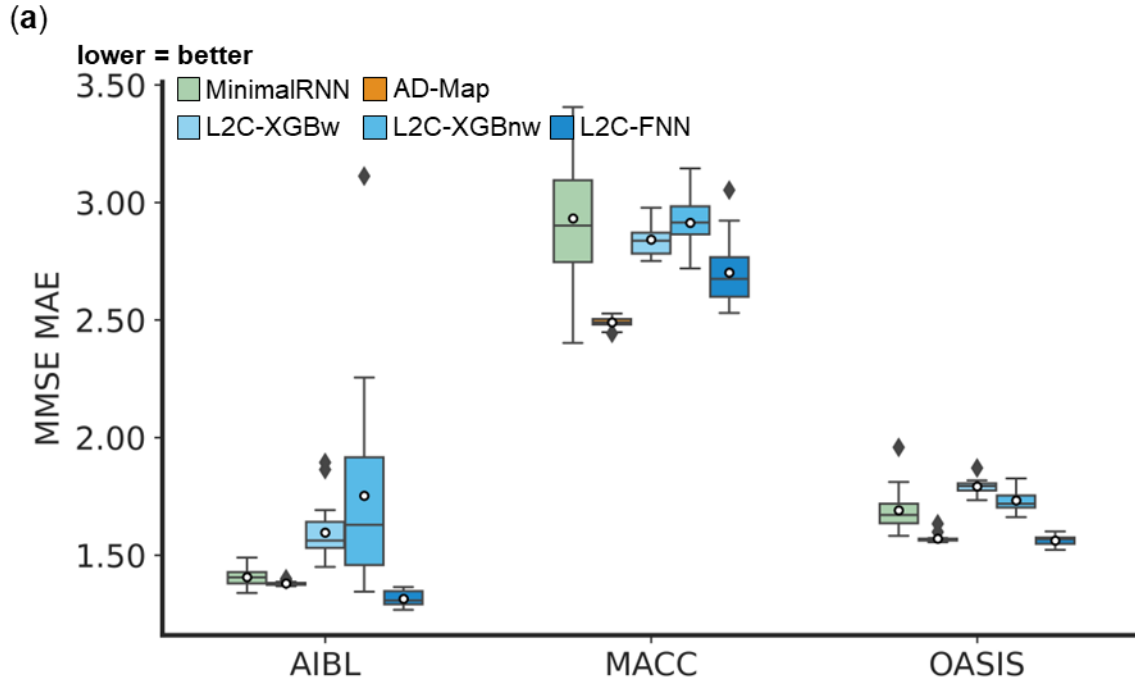

(b1)

| AIBL MMSE  | Minimal RNN | AD-Map | L2C-XGBw | L2C-XGBnw | L2C-FNN |
|------------|-------------|--------|----------|-----------|---------|
| MinimalRNN |             | n.s.   | **       | ***       | *       |
| AD-Map     | n.s.        |        | n.s.     | **        | n.s.    |
| L2C-XGBw   | **          | n.s.   |          | **        | ***     |
| L2C-XGBnw  | ***         | **     | **       |           | ***     |
| L2C-FNN    | *           | n.s.   | ***      | ***       |         |

(b2)

| MACC MMSE  | Minimal RNN | AD-Map | L2C-XGBw | L2C-XGBnw | L2C-FNN |
|------------|-------------|--------|----------|-----------|---------|
| MinimalRNN |             | ***    | n.s.     | n.s.      | **      |
| AD-Map     | ***         |        | ***      | ***       | **      |
| L2C-XGBw   | n.s.        | ***    |          | n.s.      | *       |
| L2C-XGBnw  | n.s.        | ***    | n.s.     |           | **      |
| L2C-FNN    | **          | **     | *        | **        |         |

(b3)

| OASIS MMSE | Minimal RNN | AD-Map | L2C-XGBw | L2C-XGBnw | L2C-FNN |
|------------|-------------|--------|----------|-----------|---------|
| MinimalRNN |             | ***    | **       | n.s.      | ***     |
| AD-Map     | ***         |        | ***      | ***       | n.s.    |
| L2C-XGBw   | **          | ***    |          | *         | ***     |
| L2C-XGBnw  | n.s.        | ***    | *        |           | ***     |
| L2C-FNN    | ***         | n.s.   | ***      | ***       |         |

**Figure S5. Cross-cohort MMSE prediction error (MAE) on three external test datasets for AD-only experiments (setting other dementia diagnosis to NaN).** (a) Boxplots display the variability across 20 trained models (from ADNI) for MMSE prediction assessed using MAE. The x-axis denotes the test dataset used for evaluation. (b) Statistical significance in the prediction error between all models. Each row shows the statistical difference between a model and all other models. For example, the first row of each 5 x 5 table corresponds to the statistical difference between MinimalRNN and the other models – green indicates that MinimalRNN performs better, while red indicates that MinimalRNN performs worse. Therefore, the colors are always flipped between red and green across the diagonal. “\*” indicates  $p < 0.05$  and statistical significance after multiple comparisons correction (FDR  $q < 0.05$ ). “\*\*” indicates  $p < 0.001$  and statistical significance after multiple comparisons correction (FDR  $q < 0.05$ ). “\*\*\*” indicates  $p < 0.00001$  and statistical significance after multiple comparisons correction (FDR  $q < 0.05$ ). “n.s.” indicates no statistical significance ( $p \geq 0.05$ ) or did not survive FDR correction.

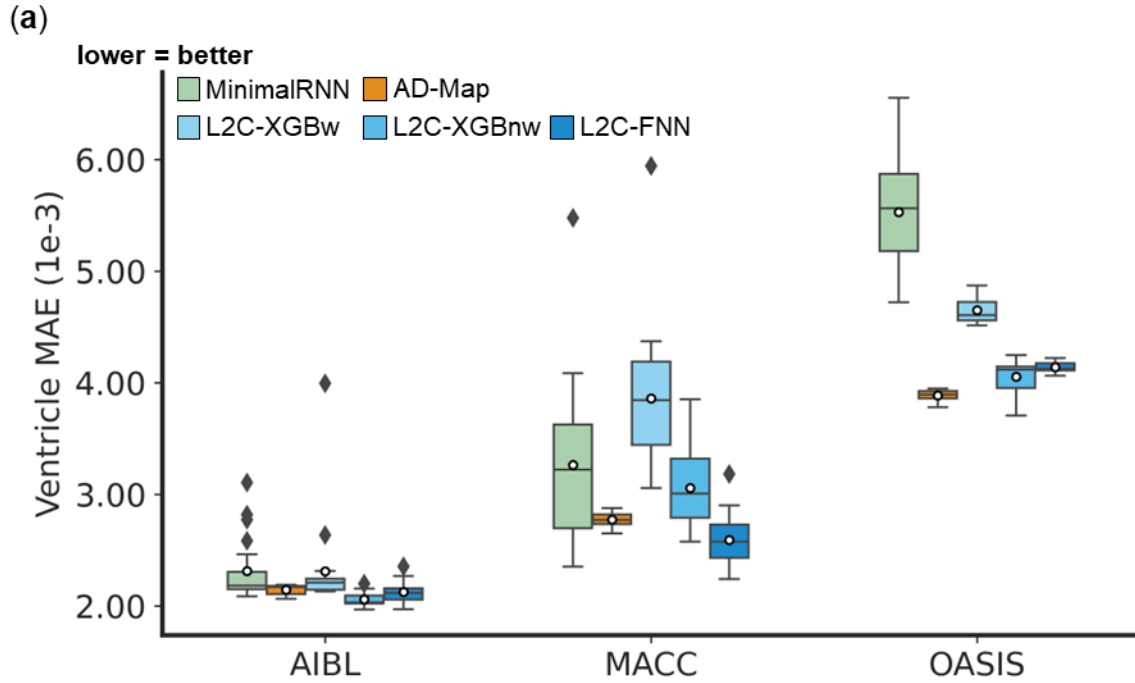

(b1)

| <b>AIBL Ventricle</b> | Minimal RNN | AD-Map | L2C-XGBw | L2C-XGBnw | L2C-FNN |
|-----------------------|-------------|--------|----------|-----------|---------|
| MinimalRNN            |             | n.s.   | n.s.     | *         | *       |
| AD-Map                | n.s.        |        | n.s.     | n.s.      | n.s.    |
| L2C-XGBw              | n.s.        | n.s.   |          | *         | n.s.    |
| L2C-XGBnw             | *           | n.s.   | *        |           | n.s.    |
| L2C-FNN               | *           | n.s.   | n.s.     | n.s.      |         |

(b2)

| <b>MACC Ventricle</b> | Minimal RNN | AD-Map | L2C-XGBw | L2C-XGBnw | L2C-FNN |
|-----------------------|-------------|--------|----------|-----------|---------|
| MinimalRNN            |             | **     | ***      | *         | ***     |
| AD-Map                | **          |        | ***      | n.s.      | n.s.    |
| L2C-XGBw              | ***         | ***    |          | ***       | ***     |
| L2C-XGBnw             | *           | n.s.   | ***      |           | ***     |
| L2C-FNN               | ***         | n.s.   | ***      | ***       |         |

(b3)

| <b>OASIS Ventricle</b> | Minimal RNN | AD-Map | L2C-XGBw | L2C-XGBnw | L2C-FNN |
|------------------------|-------------|--------|----------|-----------|---------|
| MinimalRNN             |             | ***    | *        | ***       | ***     |
| AD-Map                 | ***         |        | ***      | n.s.      | n.s.    |
| L2C-XGBw               | *           | ***    |          | ***       | ***     |
| L2C-XGBnw              | ***         | n.s.   | ***      |           | n.s.    |
| L2C-FNN                | ***         | n.s.   | ***      | n.s.      |         |

**Figure S6. Cross-cohort ventricle volume prediction error (MAE) on three external test datasets for AD-only experiments (setting other dementia diagnosis to NaN).** (a) Boxplots display the variability across 20 trained models (from ADNI) for ventricle volume prediction assessed using MAE. The x-axis denotes the test dataset used for evaluation. (b) Statistical significance in the prediction error between all models. Each row shows the statistical difference between a model and all other models. For example, the first row of each 5 x 5 table corresponds to the statistical difference between MinimalRNN and other models – green indicates that MinimalRNN performs better, while red indicates that MinimalRNN performs worse. Therefore, the colors are always flipped between red and green across the diagonal. “\*” indicates  $p < 0.05$  and statistical significance after multiple comparisons correction (FDR  $q < 0.05$ ). “\*\*” indicates  $p < 0.001$  and statistical significance after multiple comparisons correction (FDR  $q < 0.05$ ). “\*\*\*” indicates  $p < 0.00001$  and statistical significance after multiple comparisons correction (FDR  $q < 0.05$ ). “n.s.” indicates no statistical significance ( $p \geq 0.05$ ) or did not survive FDR correction.



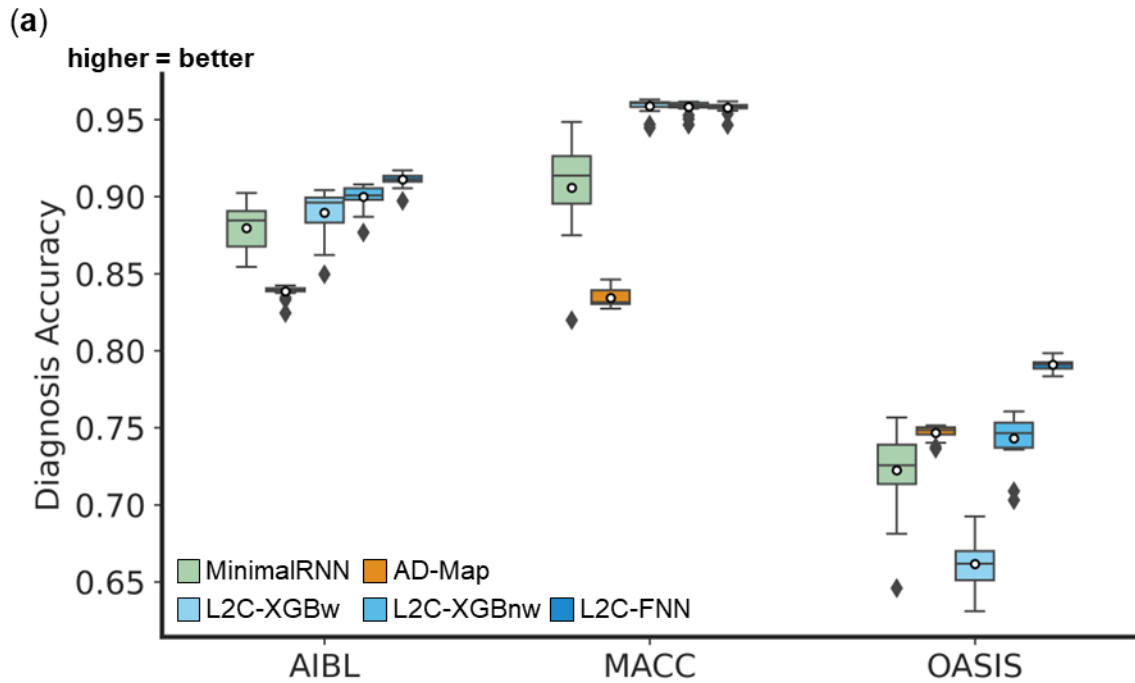

(b1)

| AIBL Diagnosis | Minimal RNN | AD-Map | L2C-XGBw | L2C-XGBnw | L2C-FNN |
|----------------|-------------|--------|----------|-----------|---------|
| MinimalRNN     |             | n.s.   | n.s.     | n.s.      | n.s.    |
| AD-Map         | n.s.        |        | *        | *         | **      |
| L2C-XGBw       | n.s.        | *      |          | n.s.      | n.s.    |
| L2C-XGBnw      | n.s.        | *      | n.s.     |           | n.s.    |
| L2C-FNN        | n.s.        | **     | n.s.     | n.s.      |         |

(b2)

| MACC Diagnosis | Minimal RNN | AD-Map | L2C-XGBw | L2C-XGBnw | L2C-FNN |
|----------------|-------------|--------|----------|-----------|---------|
| MinimalRNN     |             | **     | *        | *         | *       |
| AD-Map         | **          |        | **       | **        | **      |
| L2C-XGBw       | *           | **     |          | n.s.      | n.s.    |
| L2C-XGBnw      | *           | **     | n.s.     |           | n.s.    |
| L2C-FNN        | *           | **     | n.s.     | n.s.      |         |

(b3)

| OASIS Diagnosis | Minimal RNN | AD-Map | L2C-XGBw | L2C-XGBnw | L2C-FNN |
|-----------------|-------------|--------|----------|-----------|---------|
| MinimalRNN      |             | n.s.   | **       | n.s.      | n.s.    |
| AD-Map          | n.s.        |        | **       | n.s.      | n.s.    |
| L2C-XGBw        | **          | **     |          | **        | **      |
| L2C-XGBnw       | n.s.        | n.s.   | **       |           | **      |
| L2C-FNN         | n.s.        | n.s.   | **       | **        |         |

**Figure S7. Cross-cohort clinical diagnosis prediction accuracy (mAUC) on three external test datasets for AD-only experiments (setting other dementia diagnosis to NaN).** (a) Boxplots display the variability across 20 trained models (from ADNI) for clinical diagnosis prediction assessed using mAUC. The x-axis denotes the test dataset used for evaluation. (b) Statistical significance in the prediction error between all models. Each row shows the statistical difference between a model and all other models. For example, the first row of each 5 x 5 table corresponds to the statistical difference between MinimalRNN and other models – green indicates that MinimalRNN performs better, while red indicates that MinimalRNN performs worse. Therefore, the colors are always flipped between red and green across the diagonal. “\*” indicates  $p < 0.05$  and statistical significance after multiple comparisons correction (FDR  $q < 0.05$ ). “\*\*” indicates  $p < 0.001$  and statistical significance after multiple comparisons correction (FDR  $q < 0.05$ ). “\*\*\*” indicates  $p < 0.00001$  and statistical significance after multiple comparisons correction (FDR  $q < 0.05$ ). “n.s.” indicates no statistical significance ( $p \geq 0.05$ ) or did not survive FDR correction.
